# Supplementary material
Source: PubMed Central journal article supplement (PMC1941806)

Relative apoB mRNA Level

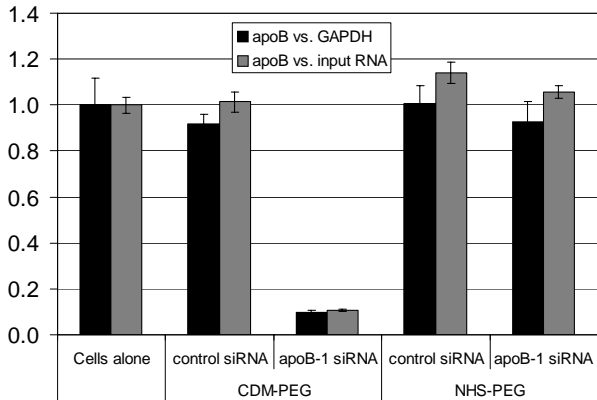

Supplement: pnas_0703778104_1.pdf [file pnas_0703778104_1.pdf]

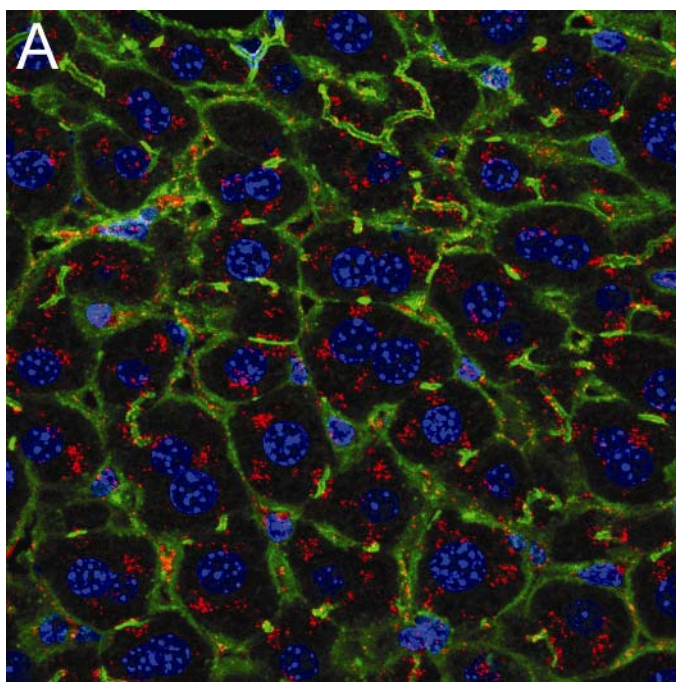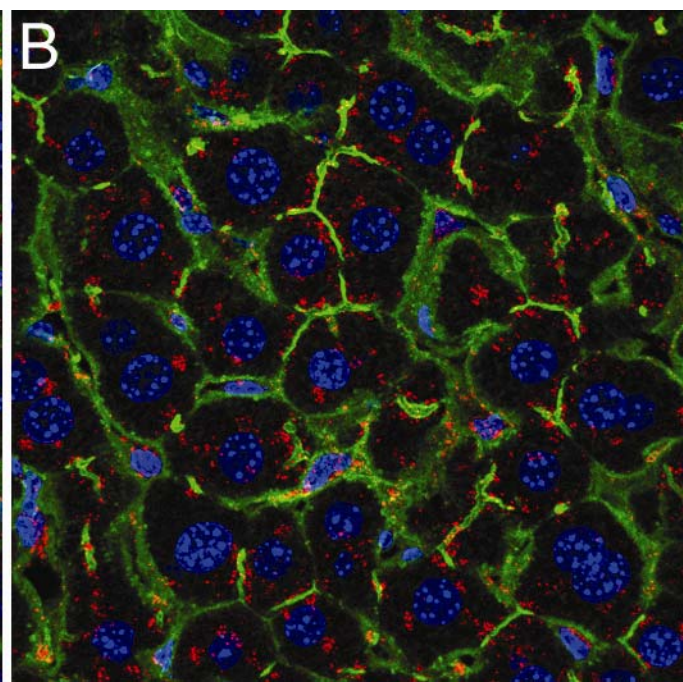

Supplement: pnas_0703778104_2.pdf [file pnas_0703778104_2.pdf]

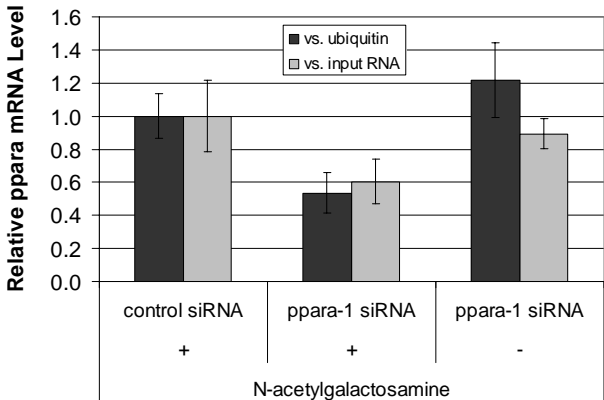

Supplement: pnas_0703778104_3.pdf [file pnas_0703778104_3.pdf]
